# Supplementary material for: Strong changes in englacial temperatures despite insignificant changes in ice thickness at Dôme du Goûter glacier (Mont Blanc area)
Source: Copernicus journal article supplement (doi:10.5194/tc-14-925-2020), 2020-03-12
Supplement: Supplementary file [file tc-14-925-2020-supplement.pdf]

Supplement of The Cryosphere, 14, 925–934, 2020  
<https://doi.org/10.5194/tc-14-925-2020-supplement>  
© Author(s) 2020. This work is distributed under  
the Creative Commons Attribution 4.0 License.

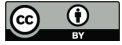

*Supplement of*

**Strong changes in englacial temperatures despite insignificant changes in ice thickness at Dôme du Goûter glacier (Mont Blanc area)**

**Christian Vincent et al.**

*Correspondence to:* Christian Vincent ([christian.vincent@univ-grenoble-alpes.fr](mailto:christian.vincent@univ-grenoble-alpes.fr))

The copyright of individual parts of the supplement might differ from the CC BY 4.0 License.

## Supplementary Material

Table 1 : Coordinates X Y Z, emergence velocities (m w.e.  $a^{-1}$ ) and horizontal velocities (m  $a^{-1}$ ) for the three periods 1997-2004, 2009-2011 and 2016-2017.

### 1997-2004

|          |          |        |     |     |
|----------|----------|--------|-----|-----|
| 950367,0 | 103509,0 | 4234,1 | 2,4 | 9,7 |
| 950302,0 | 103533,0 | 4234,1 | 2,1 | 9,4 |
| 950246,7 | 103441,6 | 4244,3 | 1,3 | 3,4 |
| 950507,2 | 103304,8 | 4293,0 | 0,5 | 1,4 |
| 950186,2 | 103484,2 | 4244,3 | 1,4 | 4,0 |
| 950248,2 | 103558,7 | 4238,0 | 2,4 | 8,5 |
| 950534,6 | 103357,9 | 4291,9 | 1,2 | 2,6 |
| 950437,3 | 103337,1 | 4268,4 | 0,8 | 3,0 |
| 950484,2 | 103398,5 | 4269,7 | 1,0 | 3,5 |
| 950408,4 | 103287,9 | 4268,5 | 0,3 | 1,5 |
| 950334,5 | 103342,4 | 4265,2 |     |     |
| 950428,7 | 103435,7 | 4253,0 | 1,3 | 5,0 |
| 950360,8 | 103402,3 | 4252,9 | 1,5 | 4,2 |
| 949917,2 | 103613,9 | 4302,3 | 0,4 | 0,6 |
| 949949,3 | 103535,0 | 4293,6 | 0,8 | 1,5 |
| 949965,5 | 103571,5 | 4296,1 | 0,7 | 1,5 |
| 949981,8 | 103632,7 | 4296,0 | 0,8 | 2,0 |
| 950025,2 | 103754,5 | 4276,0 | 3,2 | 8,2 |
| 950101,9 | 103803,2 | 4256,6 | 2,6 | 6,6 |
| 950032,2 | 103639,2 | 4282,3 | 2,7 | 6,8 |
| 950008,3 | 103581,1 | 4288,1 | 1,9 | 3,9 |
| 949967,9 | 103458,3 | 4277,5 | 0,5 | 1,5 |
| 950021,9 | 103489,2 | 4275,7 | 0,6 | 2,0 |
| 950054,9 | 103546,8 | 4274,4 | 2,5 | 5,5 |
| 950068,1 | 103640,5 | 4271,3 | 3,1 | 7,5 |
| 950238,8 | 103477,2 | 4240,2 | 1,6 | 4,1 |
| 950227,8 | 103576,9 | 4239,8 | 3,1 | 9,1 |
| 950075,7 | 103687,4 | 4267,3 | 3,2 | 8,2 |
| 950140,1 | 103713,2 | 4250,3 | 3,0 | 9,4 |
| 950111,8 | 103579,5 | 4261,7 | *   | 8,3 |
| 950044,6 | 103445,8 | 4259,5 | 0,4 | 2,7 |
| 950105,9 | 103437,2 | 4244,7 | *   | *   |
| 950166,1 | 103501,0 | 4246,9 | 1,8 | 4,6 |
| 950426,8 | 103345,1 | *      | 0,8 | 2,6 |
| 950143,7 | 103607,9 | 4253,6 | 3,3 | 7,4 |
| 950378,1 | 103430,2 | 4247,3 | 1,3 | 4,4 |
| 950323,2 | 103352,7 | 4252,6 | 0,9 | 2,4 |
| 949901,4 | 103645,4 | 4302,0 | 0,5 | 0,5 |
| 950522,0 | 103355,3 | 4287,1 | 0,9 | *   |
| 950480,9 | 103293,1 | 4285,7 | 0,3 | 1,0 |

### 2009-2011

|          |          |        |     |     |
|----------|----------|--------|-----|-----|
| 950452,3 | 103337,6 | 4271,1 | 0,9 | 2,9 |
| 950362,1 | 103398,6 | 4249,6 | 1,1 | 4,0 |
| 950394,2 | 103484,1 | 4237,9 | 1,3 | 6,7 |
| 950336,7 | 103515,8 | 4234,4 | 2,1 | 9,2 |

|          |          |        |     |      |
|----------|----------|--------|-----|------|
| 950282,5 | 103533,4 | 4234,9 | 1,7 | 8,5  |
| 950247,6 | 103618,8 | 4232,6 | 2,9 | 12,3 |
| 950228,2 | 103695,8 | 4232,8 | *   | 13,0 |
| 950010,8 | 103574,8 | 4286,6 | 1,1 | 3,3  |
| 950114,9 | 103580,1 | 4257,4 | 2,7 | 8,3  |
| 950259,4 | 103438,0 | 4244,2 | 1,0 | 3,1  |
| 950255,5 | 103446,2 | 4243,3 | 1,0 | 3,9  |
| 950180,4 | 103588,2 | 4244,9 | 2,4 | 9,0  |
| 950153,4 | 103656,6 | 4248,9 | *   | 9,6  |
| 950240,0 | 103566,4 | *      | 2,5 | 8,3  |

### 2016-2017

|          |          |        |     |      |
|----------|----------|--------|-----|------|
| 950233,5 | 103692,7 | 4231,9 | 2,3 | 11,9 |
| 950251,7 | 103614,1 | 4231,3 | 2,4 | 11,2 |
| 950288,9 | 103549,6 | 4232,5 | 1,7 | 8,9  |
| 950336,5 | 103519,6 | 4233,8 | 1,9 | 8,4  |
| 950390,7 | 103482,4 | 4237,9 | 1,3 | 6,4  |
| 950446,8 | 103342,3 | 4269,1 | 0,5 | 2,7  |
| 950360,8 | 103398,2 | 4249,6 | 0,8 | 3,6  |
| 950261,2 | 103443,0 | 4243,5 | 1,1 | 3,4  |
| 950229,9 | 103556,8 | 4236,4 | 2,1 | 7,4  |
| 950121,3 | 103579,6 | 4256,6 | 2,3 | 7,5  |
| 950009,6 | 103578,6 | 4288,4 | 1,7 | 3,2  |

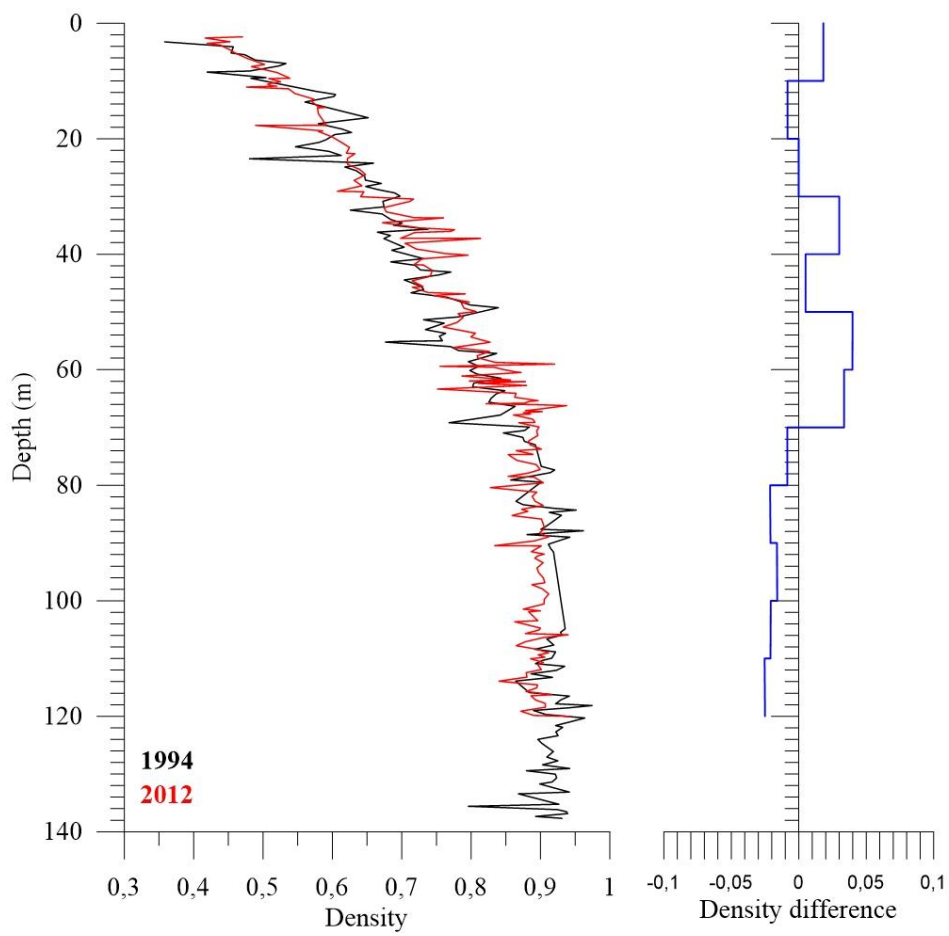

Figure S1: Relative density profiles in 1994 (black line) and 2012 (red line) and difference 2012-1994 (blue line) for each interval of 10 m.
